# Supplementary material
Source: HighWire-hosted journal article supplement (https://www.annfammed.org/highwire/filestream/13804/field_highwire_adjunct_files/0/White_VanGompel_Supp_Tables_1-3.pdf)
Supplement: White_VanGompel_Supp_Tables_1-3.pdf [file White_VanGompel_Supp_Tables_1-3.pdf]

**Supplemental materials for**

White VanGompel EC, Perez SL, Datta A, Carlock FR, Cape V, Main EK. Culture that facilitates change: a mixed methods study of hospitals engaged in reducing cesarean deliveries. *Ann Fam Med.* 2021;19(3):249-257.

| <b>Supplemental Table 1. Sampling Frame for Key Informant Interviews</b> |                   |                         |                       |              |
|--------------------------------------------------------------------------|-------------------|-------------------------|-----------------------|--------------|
| <b>Birth Volume</b>                                                      | <b>Responders</b> |                         | <b>Non-responders</b> |              |
|                                                                          | <b>Urban</b>      | <b>Rural</b>            | <b>Urban</b>          | <b>Rural</b> |
| <b>Low/Med</b>                                                           |                   |                         |                       |              |
| Total in Strata:                                                         | 7                 | 7                       | 1                     | 1            |
| Sampled:                                                                 | 1 Hospital        | 2 Hospitals             | 1 Hospital            | 1 Hospital   |
| Recruited:                                                               | 1 RN Only         | 1 RN/MD Pair; 1 RN Only | 0                     | 1 RN Only    |
| <b>High</b>                                                              |                   |                         |                       |              |
| Total in Strata:                                                         | 18                | 1                       | 20                    | 0            |
| Sampled:                                                                 | 2 Hospitals       | 0                       | 4 Hospitals           | 0            |
| Recruited:                                                               | 1 MD Only         | 0                       | 3 RN/MD Pairs         | 0            |
| Total Interviewed:                                                       | 2                 | 3                       | 6                     | 1            |
| Abbreviations: MD, physician; RN, labor and delivery nurse               |                   |                         |                       |              |

| <b>Supplemental Table 2. Characteristics of Sample Individuals and Hospitals by Hospital Success</b> |                                     |                                 |                |
|------------------------------------------------------------------------------------------------------|-------------------------------------|---------------------------------|----------------|
| <b>Individual Characteristics</b>                                                                    |                                     |                                 |                |
| <b>Maternity Role: N (%)</b>                                                                         | <b>Non-Responders<br/>(n = 342)</b> | <b>Successful<br/>(n = 553)</b> | <b>P-value</b> |
| Labor/Delivery Nurse                                                                                 | 281 (82.2%)                         | 364 (65.8%)                     | < <b>0.001</b> |
| Obstetrician                                                                                         | 41 (12.0%)                          | 99 (17.9%)                      |                |
| Certified Nurse Midwife                                                                              | 1 (0.3%)                            | 16 (2.9%)                       |                |
| Family Medicine Physician                                                                            | 0 (0.0%)                            | 18 (3.2%)                       |                |
| Anesthesiologist                                                                                     | 5 (1.5%)                            | 18 (3.2%)                       |                |
| Nurse Educator                                                                                       | 4 (1.2%)                            | 13 (2.3%)                       |                |
| Nurse Manager Educator                                                                               | 10 (2.9%)                           | 25 (4.5%)                       |                |
| Years of Practicing Maternity Care (Physicians and Midwives):<br>Mean (SD)                           | 20.30 (11.11)                       | 15.94 (11.62)                   | <b>0.030</b>   |
| Years of Working Maternity Care (Nurses): Mean (SD)                                                  | 15.95 (11.72)                       | 15.12 (11.17)                   | 0.34           |
| <b>Hospital Characteristics</b>                                                                      | <b>Non-Responder<br/>(n = 22)</b>   | <b>Successful<br/>(n = 33)</b>  | <b>P-value</b> |
| <b>NTSV CS Rate: Mean (SD)</b>                                                                       | 0.31 (0.05)                         | 0.29 (0.05)                     | 0.20           |
| <b>Nursery Acuity Level: N (%)</b>                                                                   |                                     |                                 |                |
| Basic Nursery                                                                                        | 2 (12.5%)                           | 8 (27.6%)                       | 0.053          |
| Intermediate Nursery                                                                                 | 2 (12.5%)                           | 11 (37.9%)                      |                |
| Community NICU                                                                                       | 11 (68.8%)                          | 8 (27.6%)                       |                |
| Regional NICU                                                                                        | 1 (6.2%)                            | 2 (6.9%)                        |                |
| <b>Birth Volume: N (%)</b>                                                                           |                                     |                                 |                |
| Small                                                                                                | 1 (6.2%)                            | 4 (13.8%)                       | 0.082          |
| Medium                                                                                               | 1 (6.2%)                            | 9 (31.0%)                       |                |

|                                                                                                                                                                |               |               |       |
|----------------------------------------------------------------------------------------------------------------------------------------------------------------|---------------|---------------|-------|
| Large                                                                                                                                                          | 14 (87.5%)    | 16 (55.2%)    |       |
| <b>Location: N (%)</b>                                                                                                                                         |               |               |       |
| Rural                                                                                                                                                          | 1 (6.2%)      | 8 (27.6%)     | 0.13  |
| Urban                                                                                                                                                          | 15 (93.8%)    | 21 (72.4%)    |       |
| <b>% Maternal BMI &gt; 30: Mean (SD)</b>                                                                                                                       | 0.19 (0.07)   | 0.24 (0.08)   | 0.059 |
| <b>% Maternal Age &gt; 35 Years: Mean (SD)</b>                                                                                                                 | 0.25 (0.09)   | 0.22 (0.08)   | 0.17  |
| <b>% Maternal Health Insurance Medicaid: Mean (SD)</b>                                                                                                         | 0.382 (0.292) | 0.476 (0.272) | 0.29  |
| <b>Years Practicing at This Hospital: Mean (SD)</b>                                                                                                            | 11.51 (3.769) | 11.03 (4.61)  | 0.60  |
| Abbreviations: BMI, body mass index; CS, cesarean section; NICU, newborn intensive care unit; NTSV, nulliparous term singleton vertex; SD, standard deviation. |               |               |       |

**Supplemental Table 3. Labor Culture Survey Sub-scale Means by Hospital Success, Stratified by Labor and Delivery Nurses and Physicians**

| Sub-scale           | Nurses                     |                         |              | Physicians                |                         |                   |
|---------------------|----------------------------|-------------------------|--------------|---------------------------|-------------------------|-------------------|
|                     | Non-Responder<br>(n = 281) | Successful<br>(n = 378) | P-value      | Non-Responder<br>(n = 41) | Successful<br>(n = 130) | P-value           |
| Best Practices      | 4.08                       | 4.08                    | 0.98         | 3.35                      | 3.72                    | <b>0.003</b>      |
| Fear                | 1.55                       | 1.51                    | 0.52         | 2.27                      | 1.70                    | <b>0.001</b>      |
| Microculture        | 3.10                       | 3.27                    | <b>0.001</b> | 3.41                      | 3.60                    | <b>0.044</b>      |
| Physician Oversight | 4.09                       | 4.00                    | 0.13         | 3.02                      | 3.55                    | <b>&lt; 0.001</b> |
| Maternal Agency     | 3.16                       | 3.13                    | 0.70         | 3.07                      | 2.84                    | 0.111             |
| CS Safety           | 2.13                       | 2.06                    | 0.27         | 2.48                      | 2.11                    | <b>0.014</b>      |

Abbreviations: CS, cesarean section
